# Supplementary material
Source: PubMed Central journal article supplement (PMC2517256)
Supplement: NIHMS58810-supplement-3.pdf [file NIHMS58810-supplement-3.pdf]

Comparative Proteomics of Human Monkeypox and Vaccinia Intracellular Mature  
and Extracellular Enveloped Virions

Nathan P. Manes, Ryan D. Estep, Heather M. Mottaz, Ronald J. Moore, Therese R. W. Clauss,  
Matthew E. Monroe, Xiuxia Du, Joshua N. Adkins, Scott W. Wong, and Richard D. Smith

Journal of Proteome Research  
Oct 22, 2007

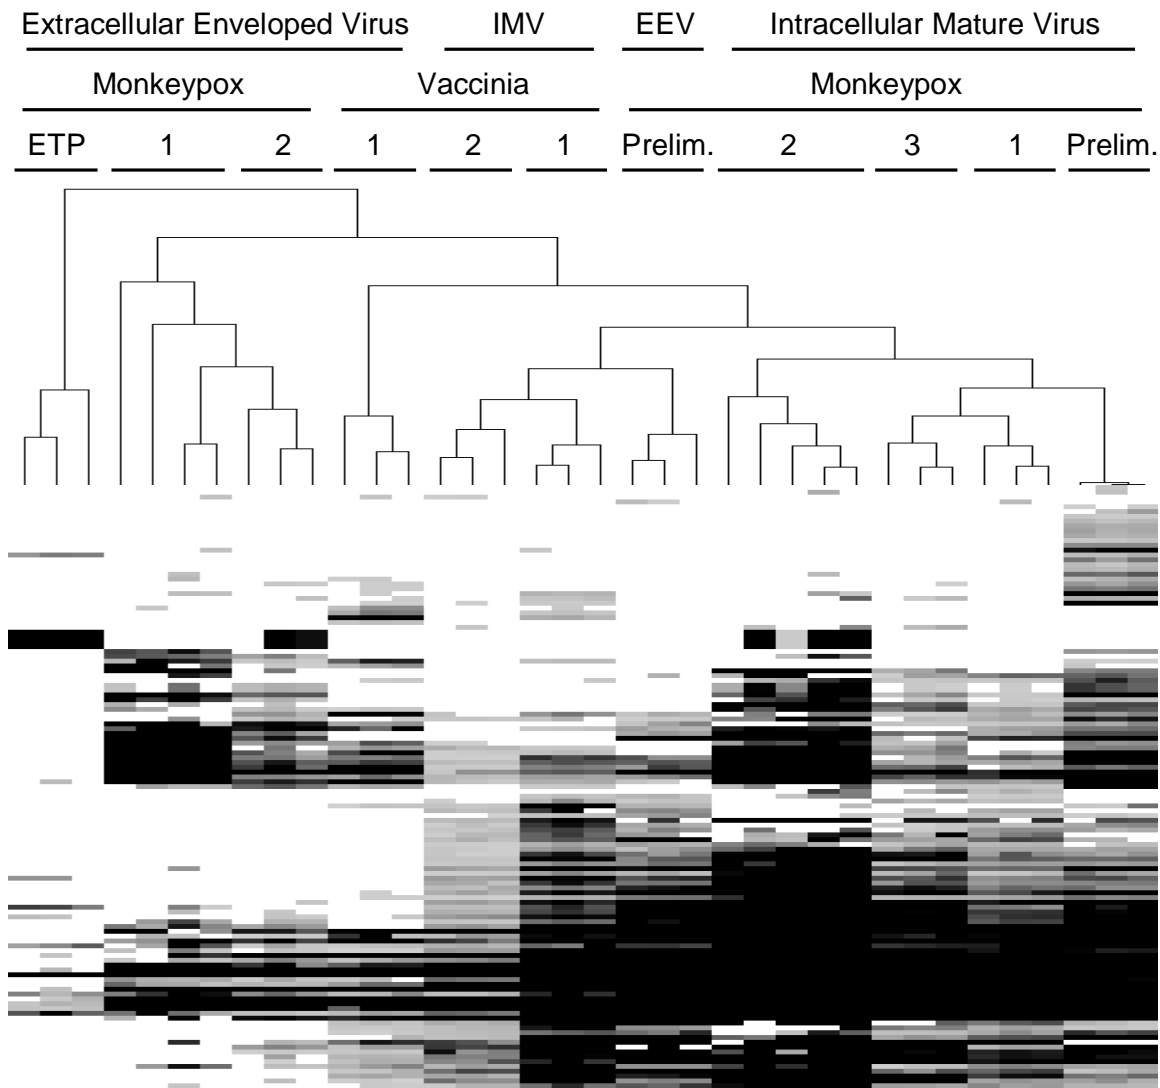

**Supplemental Figure 1**

This is the same hierarchal cluster analysis as Figure 4 (viral proteins) except that the columns (i.e., the experiments) were clustered to demonstrate the sample relationships. The similarity of the experiments is visualized as a tree. Overall, the LC-MS replicates clustered together. Also, the preliminary monkeypox EEV sample clustered with the IMV samples.
